# Supplementary material for: Depleting Cationic Lipids Involved in Antimicrobial Resistance Drives Adaptive Lipid Remodeling in Enterococcus faecalis
Source: PubMed Central journal article supplement (PMC9973042; doi:10.1128/mbio.03073-22), 2023-01-11

**A**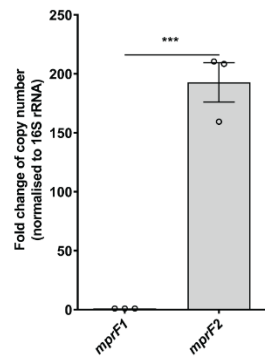**B**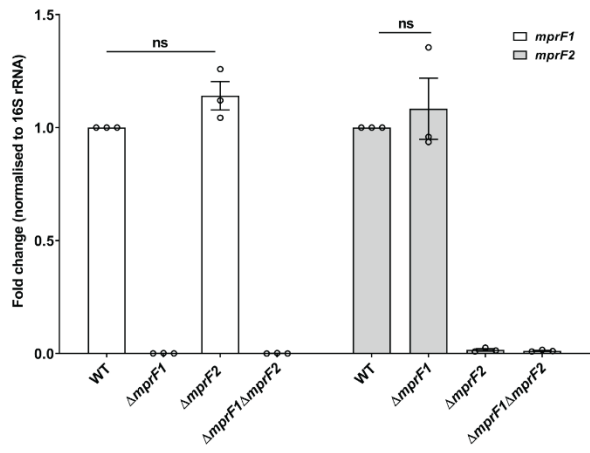**C**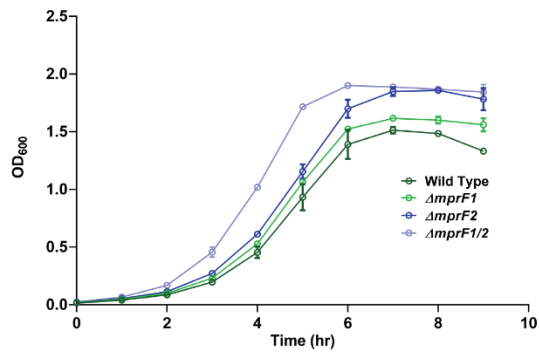**D**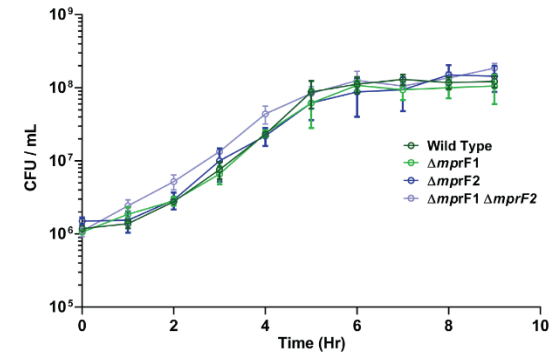**E**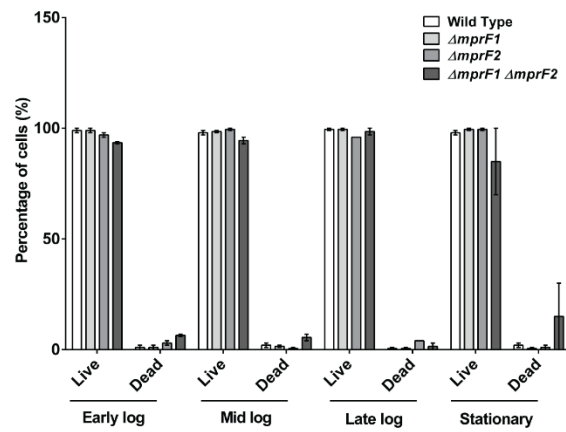

Supplement: mbio.03073-22-s0002.pdf [file mbio.03073-22-s0002.pdf]
