# Supplementary material for: Depleting Cationic Lipids Involved in Antimicrobial Resistance Drives Adaptive Lipid Remodeling in Enterococcus faecalis
Source: PubMed Central journal article supplement (PMC9973042; doi:10.1128/mbio.03073-22), 2023-01-11

**Chloroform: Methanol: Water (65:25:4) Solvent System**

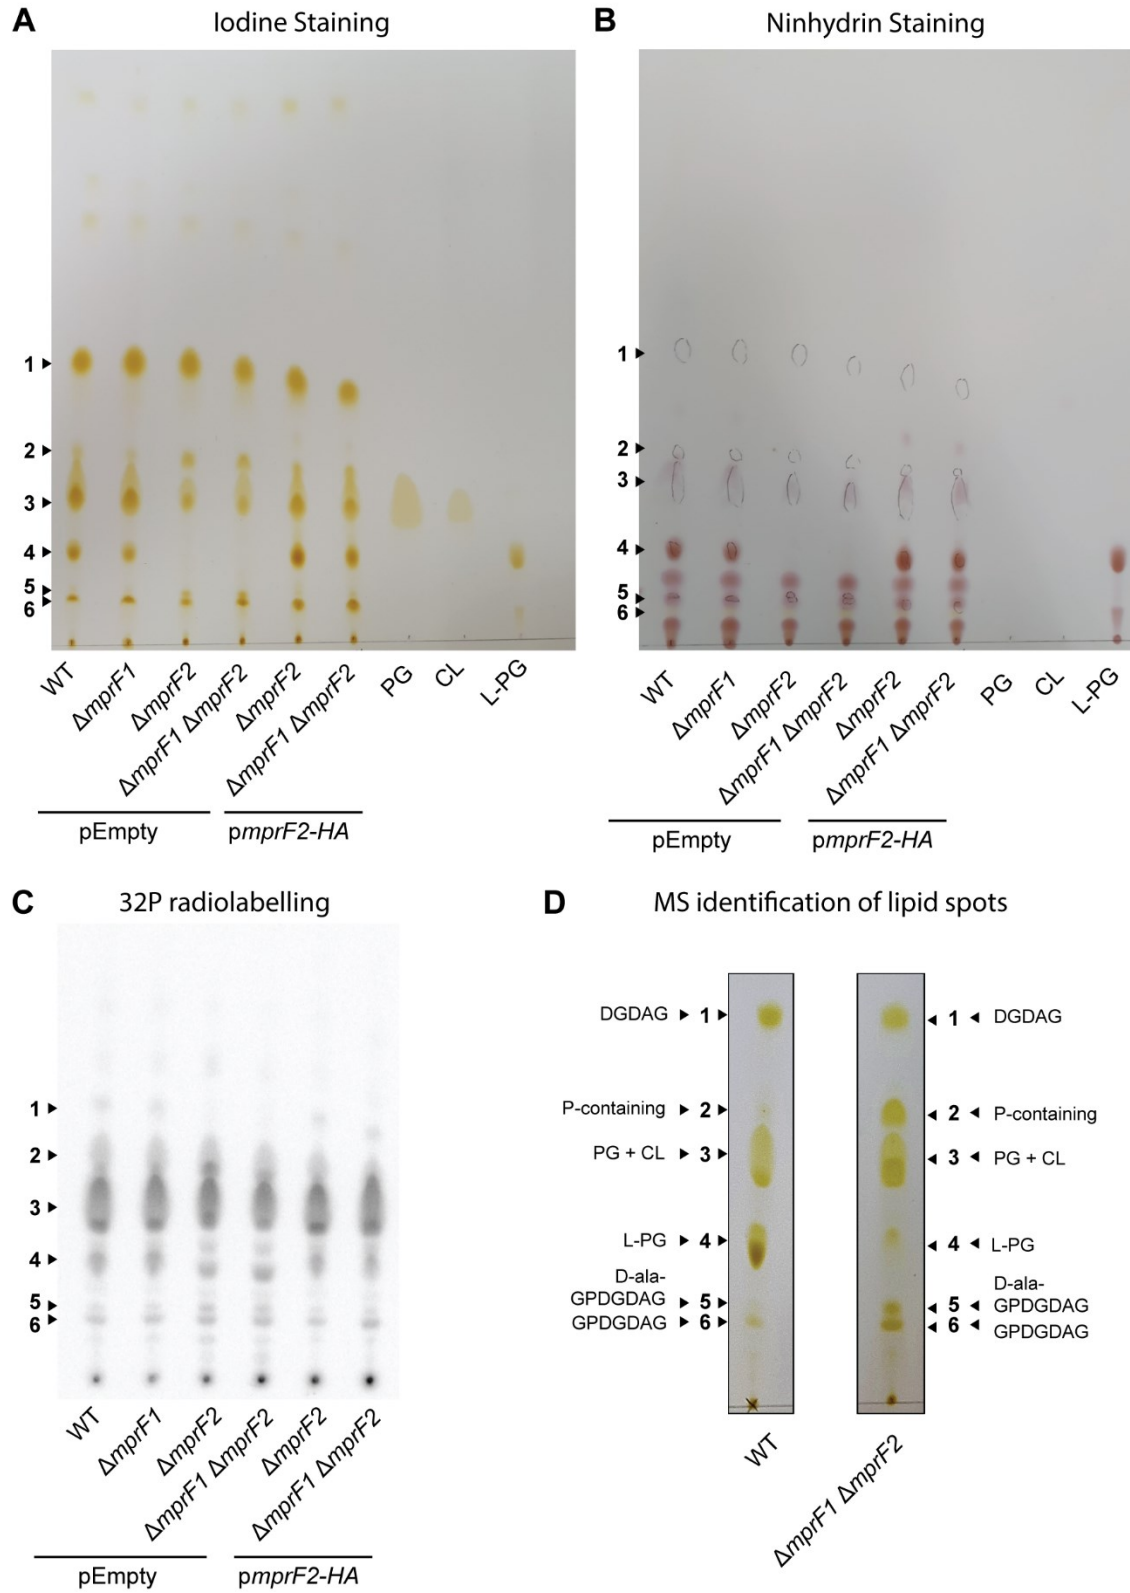

**E 2 Dimension TLC**

1<sup>st</sup> dimension = Chloroform: Methanol: Water (65:25:4)

2<sup>nd</sup> dimension = Chloroform: Hexane: Methanol: Acetic acid (50:30:10:5)

**<sup>14</sup>C Radiolabelled**

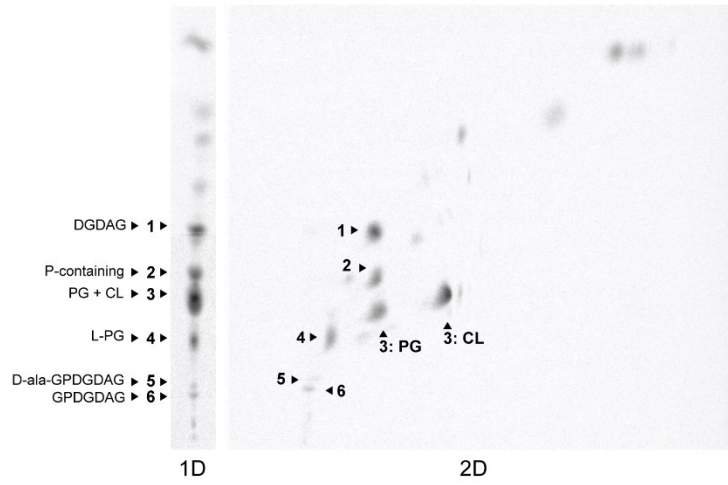

**<sup>32</sup>P Radiolabelled**

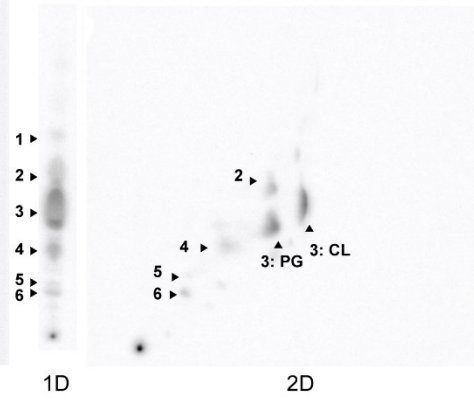

Supplement: mbio.03073-22-s0004.pdf [file mbio.03073-22-s0004.pdf]
